# Supplementary material for: Effect of Light of Different Spectral Compositions on Pro/Antioxidant Status, Content of Some Pigments and Secondary Metabolites and Expression of Related Genes in Scots Pine
Source: MDPI journal article supplement (doi:10.3390/plants12132552), 2023-07-05
Supplement: s1 [file s1]

Table S1. Primers for qRT-PCR analysis

|    | Gene Bank ID                      | Gene description               | Gene        | Primer 5'-3'             |                         |
|----|-----------------------------------|--------------------------------|-------------|--------------------------|-------------------------|
|    |                                   |                                |             | forward                  | reverse                 |
| 1  | B0ZQ68 (uniprot.org)              | 4-coumarate-CoA ligase         | <i>4CL</i>  | AAACTGGCGAGTCTCTACCG     | ATTGTAGCGCCGTGGATTC     |
| 2  | A0A023W7L9 (uniprot.org)          | cinnamate 4-hydroxylase        | <i>CH4</i>  | ATTCGGGAACTGTTGCAGG      | TGGCGAGATCGGGAGATGAA    |
| 3  | MA_407452g0010 (congenie.org)     | Phytoene synthase              | <i>PSY</i>  | TCAAGATGAGCTTGCACGGA     | ACCGGCCATCTACTGGTTTT    |
| 4  | MF395340.1 (ncbi.nlm.nih.gov)     | bHLH transcription factors     | <i>MYC</i>  | AAAAGGCCCCGGAAAAGAGG     | TTGGTACCACAGCACGAAGC    |
| 5  | EF083399.1 (ncbi.nlm.nih.gov)     | Jasmonate-Zim domain 1         | <i>JAZa</i> | GGTGAACGTGTATGATGATATTCC | CGTTGCAGAGAATGCTTCCTC   |
| 6  | GIL001669683.1 (ncbi.nlm.nih.gov) | Jasmonate-Zim domain 2         | <i>JAZb</i> | ATGCTGCTCGCTGATAGTG      | CGCCAGAAGTCTGAAGAGA     |
| 7  | EF084624.1 (ncbi.nlm.nih.gov)     | Pathogenesis-related protein 1 | <i>PR1</i>  | GCACTCTGGTGGTCAATACG     | CACCCGAGCCTCTTGGAA      |
| 8  | MZ222278.1 (ncbi.nlm.nih.gov)     | Pathogenesis-related protein 5 | <i>PR5</i>  | CCTGCGTTGCTTCAATAC       | GCAAGTGAAGGTGCTGGT      |
| 9  | BN000697.1 (uniprot.org)          | leucoanthocyanidin reductase   | <i>LAR</i>  | TACAACGCCGAGAACAACCA     | TTTCACACTGGCCTCTGCAA    |
| 10 | Q8RUZ3 (uniprot.org)              | phenylalanine ammonia-lyase    | <i>PAL</i>  | ATTGAAATGAGCGGAGCCGA     | CACACAATGGAAGCCAGTGC    |
| 11 | CBB44933.1 (uniprot.org)          | Actin 1                        | <i>ACT1</i> | TTAGCAACTGGGATGACATGGA   | CCTGAATGGCAACATACATAGCA |

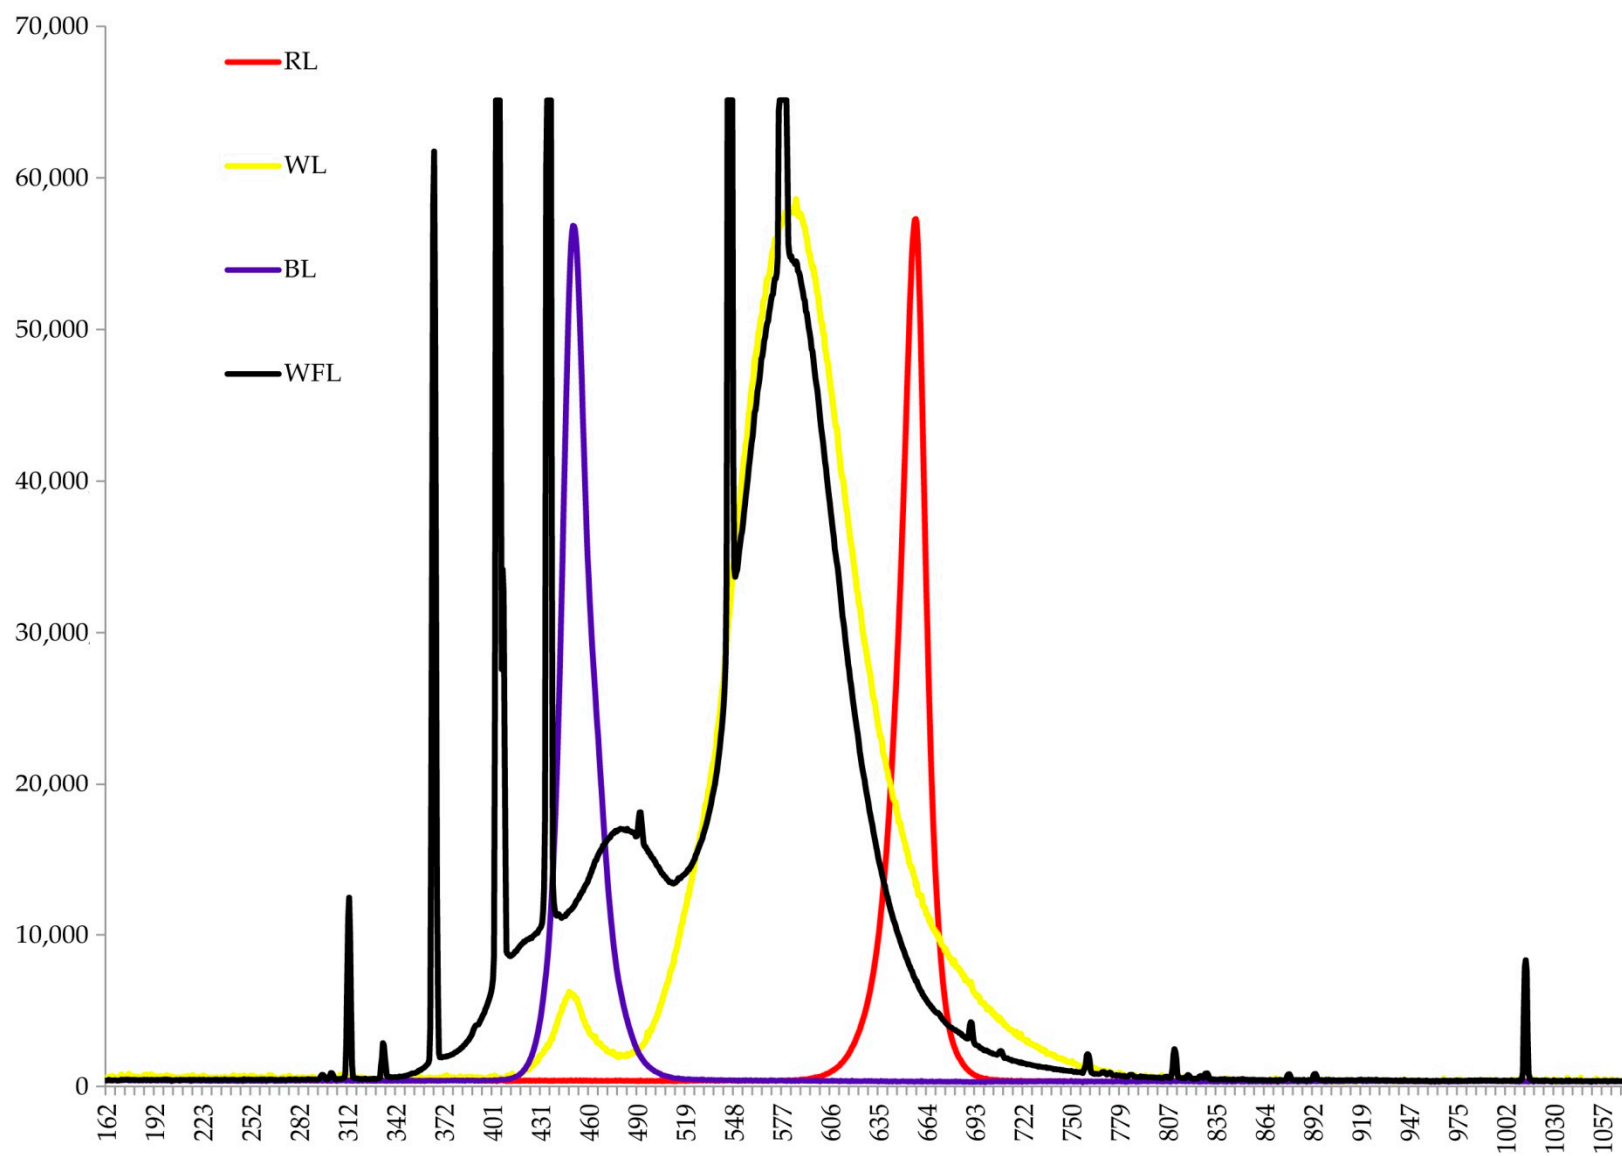

**Figure S1.** Emission spectra of various light sources used in the experiment.
